# Supplementary material
Source: Springer Nature journal article supplement (https://www.springermedizin.de/resource/supplementary/12885_2011_3248_MOESM2_ESM.pdf/9462866)
Supplement: MOESM2 [file 9462866]

A.

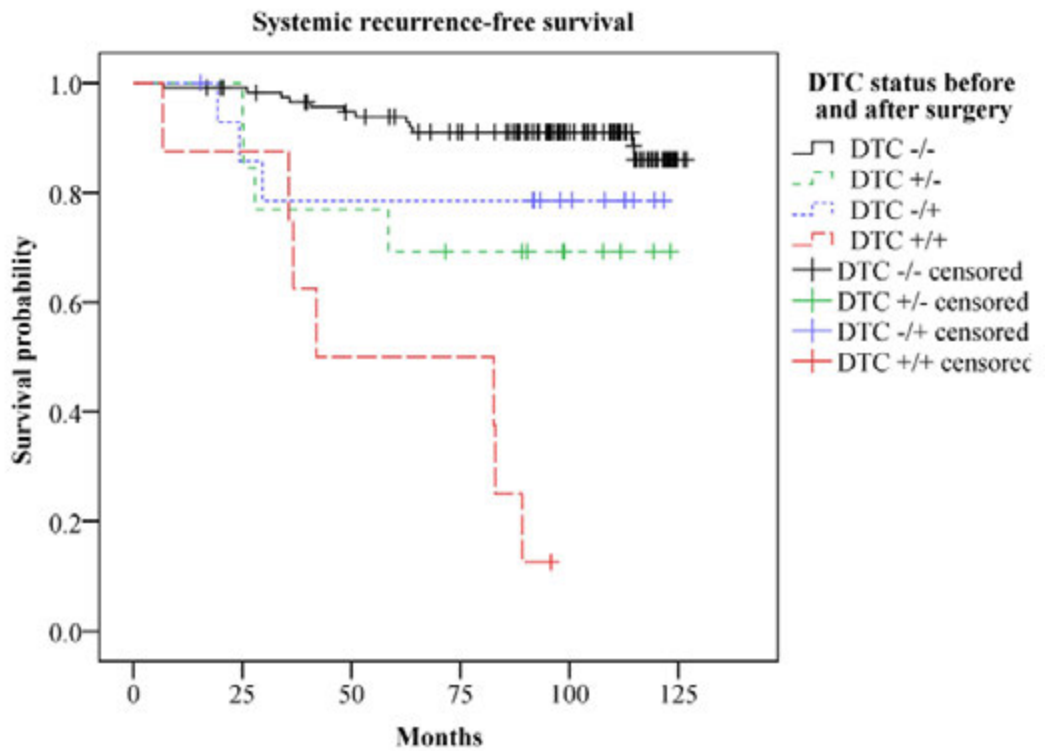

|                          |     |     |     |     |     |     |
|--------------------------|-----|-----|-----|-----|-----|-----|
| <b>No at risk DTC-/-</b> | 118 | 117 | 111 | 108 | 108 | 106 |
| <b>No at risk DTC+/-</b> | 13  | 12  | 10  | 9   | 9   | 9   |
| <b>No at risk DTC-/+</b> | 15  | 13  | 12  | 12  | 12  | 12  |
| <b>No at risk DTC+/+</b> | 8   | 7   | 4   | 4   | 1   | 1   |

B.

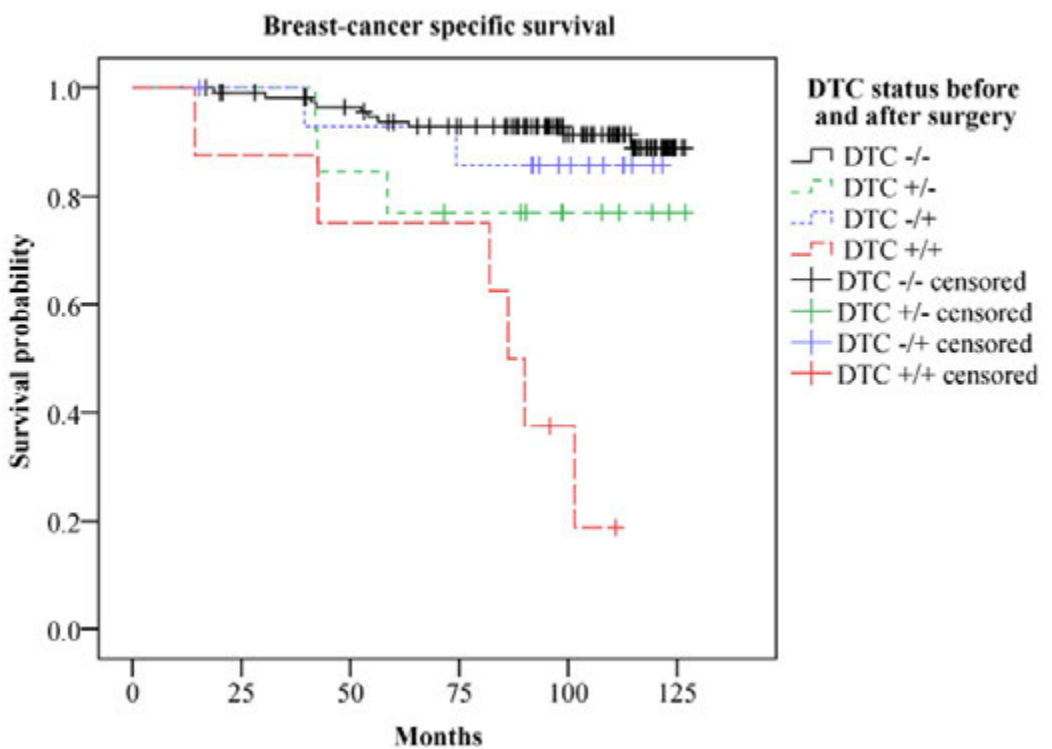

|                          |     |     |     |     |     |     |
|--------------------------|-----|-----|-----|-----|-----|-----|
| <b>No at risk DTC-/-</b> | 118 | 117 | 114 | 110 | 109 | 108 |
| <b>No at risk DTC+/-</b> | 15  | 15  | 13  | 12  | 12  | 12  |
| <b>No at risk DTC-/+</b> | 13  | 13  | 12  | 11  | 11  | 11  |
| <b>No at risk DTC+/+</b> | 8   | 7   | 6   | 6   | 3   | 2   |
